# Supplementary material for: Internet-Based Interventions for Problem Gambling: Scoping Review
Source: PubMed Central journal article supplement (PMC6329421; doi:10.2196/mental.9419), 2019-01-07
Supplement: mental_v6i1e65_app1.pdf [file mental_v6i1e65_app1.pdf]

## Appendix I: Search strings

### PsychInfo: 81 and MEDLINE: 36

1. exp gambling/
2. ((problem\* or Patholog\* or Compuls\* or addict\*) adj3 gambl\*).mp.
3. or/1-2 [gambling concept]
4. online therapy/
5. ((online or web or internet or internet-based or app or apps or application\* or tablet\* or ipad) adj3 (therap\* or intervention\* or psychiatr\* or counsel\* or treatment\*)).mp.
6. (e-therap\* or etherap\* or ecounsel\* or e-counsel\* or cybercounsel\* or cyber-counsel\* or cybertherap\* or cyber-therap\* or teletherap\* or telecounsel\* or telepsychiatr\*).mp.
7. or/4-6 [etherapy concept]
8. 3 and 7

### CINAHL: 8

MH "gambling" AND

((problem\* or Patholog\* or Compuls\* or addict\*) n3 gambl\*) )

AND

(( (online or web or internet or internet-based or app or apps or application\* or tablet\* or ipad) n3 (therap\* or intervention\* or psychiatr\* or counsel\* or treatment\*)) )

OR

(e-therap\* or etherap\* or ecounsel\* or e-counsel\* or cybercounsel\* or cyber-counsel\* or cybertherap\* or cyber-therap\* or teletherap\* or telecounsel\* or telepsychiatr\*) ) )

### **Social science abstracts: 13**

((problem\* or Patholog\* or Compuls\* or addict\*) n3 gambl\*). ) AND ( (online or web or internet or internet-based or app or apps or application or tablet\* or ipad) n3 (therap\* or intervention\* or psychiatr\* or counsel\* or treatment)) )

### **Scopus 220**

( TITLE-ABS-KEY ( ( ( problem\* OR patholog\* OR compuls\* OR addict\* ) W/3 gambl\* ) . ) ) AND ( ( ( ( online OR web OR internet OR internet-based OR app OR apps OR application OR tablet\* ) W/3 ( therap\* OR intervention\* OR psychiatr\* OR counsel\* OR treatment\* ) ) ) ) AND ( LIMIT-TO ( PUBYEAR , 2017 -2007 )

### **Web of science 250**

#1: TS=((problem\* OR Patholog\* OR Compuls\* OR addict\* OR disorder\*) NEAR/3 gambl\*)

#2 TS= ((online OR web OR internet OR internet-based OR ape OR apps OR application OR tablet\* OR pad) AND (therapy\* OR intervention\* OR psychiatry\* OR counsel\* OR treatment\*))

#1 AND #2
